# Supplementary material for: Identification of Immune-Related Genes for Establishment of Prognostic Index in Hepatocellular Carcinoma
Source: Frontiers journal article supplement (doi:10.3389/fcell.2021.760079), 2021-11-02
Supplement: Table_4.xls [file Table_4.xls]

## Sheet: 4Immune related DEGs
Table 4: Immune related differentially expressed genes(DEGs)
ID	conMean	treatMean	logFC	pValue	fdr
SLC3A2	3.6949	4.28044	0.58554	3.97e-09	7.08e-09
LCN2	1.79846	4.43786	2.6394	1.91e-10	3.72e-10
RIPK2	1.65763	2.45026	0.792629	5.33e-12	1.14e-11
SPP1	3.03778	5.49923	2.46145	2.72e-07	4.34e-07
LYZ	4.00863	5.72954	1.72091	2.09e-07	3.36e-07
HSPD1	6.17948	6.82009	0.64061	5.01e-15	1.36e-14
PTK2	1.65476	2.58461	0.929855	1.97e-23	1.83e-22
HSF1	2.88281	4.04261	1.15979	3.17e-25	5.14e-24
HSP90AA1	6.05908	6.99895	0.939872	6.55e-19	2.67e-18
SDC2	5.78559	6.33757	0.551976	4.2e-10	7.97e-10
TSTA3	3.58916	4.5383	0.949145	9.59e-18	3.44e-17
NR1I2	3.35621	2.22083	-1.13538	1.58e-10	3.08e-10
HSPA5	6.70151	7.71869	1.01719	1.04e-19	4.7e-19
BCL7C	1.99275	2.82089	0.82814	3.77e-18	1.41e-17
EIF6	5.67641	6.54294	0.866537	2.74e-20	1.36e-19
HSP90AB1	6.81068	8.28653	1.47585	3.53e-26	8.81e-25
ABCF1	3.4823	4.34277	0.860469	1.2e-21	7.5e-21
MAPKAPK2	3.66075	4.72968	1.06894	8.53e-21	4.57e-20
ATF4	5.98987	6.5525	0.562631	4.89e-09	8.66e-09
GCGR	4.29722	2.28614	-2.01109	4.03e-10	7.67e-10
PAFAH1B3	1.59281	3.24152	1.64871	2.23e-19	9.67e-19
TNFRSF4	0.341983	1.49864	1.15665	6.79e-26	1.47e-24
F11	4.71577	3.74349	-0.97228	1.93e-11	4e-11
MASP1	4.04402	2.84737	-1.19665	8.75e-20	4.01e-19
ERBB3	3.32619	4.53199	1.2058	1.65e-21	1.01e-20
XDH	3.95278	2.77044	-1.18234	1.12e-09	2.07e-09
TRIM27	2.35678	3.30654	0.949765	2.3e-25	3.94e-24
PLG	8.58689	6.82718	-1.75971	1.74e-19	7.68e-19
PSMB5	4.91477	5.85321	0.938448	5.62e-27	2.21e-25
AVPR1A	3.18023	1.17889	-2.00134	2.83e-15	7.87e-15
FKBP8	5.63125	6.3616	0.730349	2.17e-17	7.52e-17
ITGAE	0.512174	1.02935	0.517173	3.57e-17	1.2e-16
BID	2.67989	3.39039	0.710502	9.98e-15	2.64e-14
C1R	8.67292	7.1281	-1.54482	9.14e-23	7.11e-22
CAT	7.36812	6.34271	-1.02541	2.28e-14	5.89e-14
PPIA	4.86063	6.04557	1.18494	9.81e-28	7.12e-26
RABEP2	1.38383	2.04722	0.663388	6.14e-17	2.02e-16
NR2F6	4.30942	5.08933	0.779913	1.2e-15	3.45e-15
NFYA	1.75601	2.6488	0.892789	5.49e-19	2.26e-18
SEM1	2.59139	3.49698	0.905586	6.38e-22	4.19e-21
IRAK1	3.07485	4.74982	1.67497	6.88e-26	1.48e-24
MDK	1.91439	5.3417	3.42731	1e-24	1.36e-23
ANXA11	3.09665	3.965	0.868351	5.74e-19	2.35e-18
RXRB	2.60663	3.55478	0.948149	1.28e-25	2.44e-24
BANF1	4.81186	5.88396	1.0721	7.84e-26	1.63e-24
FKBP4	3.86217	4.54023	0.678054	9.55e-14	2.35e-13
HDGF	5.85714	6.58292	0.725788	1.19e-20	6.28e-20
PPP4C	4.40413	4.95757	0.55344	5.16e-13	1.2e-12
AFP	0.991662	2.96493	1.97327	2.4e-06	3.6e-06
HM13	3.28737	4.39867	1.1113	2.68e-26	7.04e-25
NR1H2	3.59531	4.2535	0.658186	3.77e-20	1.82e-19
ILF2	4.22862	5.7024	1.47377	1.08e-27	7.42e-26
UBXN1	4.01435	4.87774	0.8634	1.32e-21	8.17e-21
FKBPL	1.52167	2.57591	1.05424	1.02e-25	2.01e-24
CACYBP	2.24204	3.59153	1.34949	6e-27	2.31e-25
TMSB10	7.90301	9.28945	1.38644	5.91e-12	1.26e-11
NFKB2	2.68345	3.798	1.11455	7.34e-18	2.67e-17
SOCS2	2.77347	1.43814	-1.33533	1.17e-16	3.73e-16
TCIRG1	3.11474	4.16673	1.05199	3.06e-16	9.35e-16
FKBP1A	4.48859	5.52634	1.03775	2.89e-23	2.55e-22
ISG20L2	1.93005	2.84875	0.918699	1.85e-24	2.28e-23
PSMD4	4.76212	6.28074	1.51862	2.02e-28	3.46e-26
NENF	4.54645	5.65167	1.10522	5.37e-20	2.54e-19
PSMB7	5.57457	6.10404	0.529476	1.49e-13	3.61e-13
MT2A	10.1546	7.01871	-3.13586	7.45e-22	4.85e-21
C1QTNF6	0.799209	1.69499	0.895785	2.53e-21	1.49e-20
BCAP31	5.5017	6.7774	1.2757	1.07e-25	2.09e-24
PSMC5	4.08591	4.9169	0.83099	3.26e-23	2.83e-22
PSMC4	4.20812	5.37851	1.1704	1.27e-28	3.17e-26
PDIA3	6.15186	6.99089	0.839029	3.18e-20	1.56e-19
TDP2	3.23177	3.99986	0.768087	9.14e-21	4.89e-20
IRF3	2.79662	3.92941	1.13279	9.34e-24	9.4e-23
IRF5	1.07586	1.80143	0.725567	4.35e-17	1.45e-16
ADRM1	5.0024	5.7407	0.738293	4.13e-20	1.98e-19
C1RL	5.59461	4.44332	-1.15129	1.27e-22	9.61e-22
MICA	1.65075	2.64725	0.996499	1.49e-20	7.72e-20
CD320	2.44749	3.51205	1.06455	1.19e-20	6.28e-20
CP	7.40347	5.96174	-1.44173	7.95e-13	1.82e-12
ENTPD5	4.46834	3.90798	-0.56036	0.000476	0.000616
BAX	2.96968	4.27001	1.30033	7.52e-23	5.93e-22
TPM2	1.50461	3.17372	1.66911	1.48e-23	1.42e-22
RAC1	5.12774	5.9061	0.778368	1.71e-20	8.77e-20
SKIV2L	2.61436	3.54668	0.932317	3.21e-25	5.18e-24
PSMB4	5.74818	7.01773	1.26955	2.52e-28	3.64e-26
BAG6	4.59296	5.54232	0.949363	1.2e-24	1.57e-23
PDCD6	2.03199	2.91283	0.880838	8.01e-28	6.23e-26
DAP3	3.4643	4.66009	1.19579	3.79e-28	4.37e-26
GPANK1	1.99329	3.04122	1.04793	1.03e-24	1.39e-23
MAP2K2	3.32806	4.46023	1.13217	3.14e-26	8.07e-25
PROS1	5.86296	5.05132	-0.811639	1.15e-13	2.81e-13
DDAH2	3.43409	4.46383	1.02973	6.97e-15	1.87e-14
OGFR	3.48581	3.98659	0.500782	1.37e-11	2.86e-11
F8	1.5985	1.08828	-0.510218	1.85e-11	3.84e-11
PPIB	6.31573	7.33902	1.02329	2.53e-24	2.98e-23
HRAS	2.42343	3.64962	1.2262	7.59e-25	1.07e-23
RPL7	6.14012	7.20989	1.06977	1.47e-16	4.63e-16
CKLF	1.43817	2.52277	1.0846	7.16e-23	5.7e-22
PSMC3	5.08302	5.85021	0.767192	5.87e-22	3.88e-21
DDA1	2.02953	2.85078	0.821253	3.61e-25	5.67e-24
RELB	2.05003	2.99634	0.946315	1.19e-11	2.5e-11
ITGB1BP1	1.22998	2.22276	0.992782	1.28e-26	4e-25
ADM2	0.628723	1.97623	1.3475	6.47e-17	2.12e-16
EIF3M	3.00329	3.73365	0.73036	3.68e-21	2.11e-20
NAMPT	4.62855	3.67963	-0.948923	2.28e-07	3.65e-07
KPTN	1.58474	2.44372	0.85898	2.33e-22	1.65e-21
BAD	3.73454	4.32637	0.591828	8.19e-12	1.74e-11
PSMC2	4.01072	4.81221	0.801484	1.28e-24	1.66e-23
NFKBIE	2.17335	2.98655	0.813203	3.31e-10	6.33e-10
GNE	4.64631	3.52532	-1.12098	2.36e-17	8.14e-17
GHR	4.61054	2.55725	-2.05329	1.52e-21	9.33e-21
SORT1	1.22743	2.59417	1.36673	3.08e-17	1.05e-16
S100A10	4.55973	6.16629	1.60656	1.88e-18	7.24e-18
PSMA7	5.66721	6.43959	0.772381	6.67e-20	3.11e-19
FTH1	7.09061	7.95715	0.866534	8.93e-17	2.89e-16
NFKBIL1	2.75633	3.9095	1.15318	5.3e-25	7.87e-24
PSME2	4.69176	5.52809	0.836329	4.59e-15	1.25e-14
PSMA5	3.66824	4.17472	0.506486	9.77e-13	2.21e-12
IK	3.46479	4.40653	0.941745	6.09e-27	2.31e-25
INHBC	5.06878	3.78853	-1.28026	5.88e-09	1.04e-08
S100A13	2.75389	3.42407	0.67018	4.62e-05	6.4e-05
PBX2	2.49337	3.47695	0.983584	3.68e-21	2.11e-20
AIMP1	2.80532	3.63794	0.832628	4.75e-24	5.13e-23
GCH1	4.50143	3.32667	-1.17476	1.01e-14	2.67e-14
RFXANK	2.19528	3.55258	1.3573	1.25e-26	3.95e-25
PRRC2A	2.99529	4.04309	1.0478	2.47e-20	1.23e-19
CD151	4.56354	5.75042	1.18688	1.78e-16	5.58e-16
CALR	7.90014	8.8916	0.991457	1.05e-19	4.75e-19
GPI	4.39494	5.24048	0.845543	1.93e-16	6.04e-16
LPA	3.62223	1.73233	-1.8899	2.38e-22	1.68e-21
C1S	8.84499	7.7691	-1.07589	4.33e-16	1.3e-15
BSG	5.25289	6.68745	1.43456	5.16e-26	1.19e-24
PLSCR4	3.32781	2.10747	-1.22034	3.48e-20	1.69e-19
MYDGF	5.31793	6.26736	0.949425	4.46e-22	3.01e-21
PRELID1	3.97169	4.80553	0.833835	8.81e-22	5.63e-21
PSMD13	3.64327	4.43448	0.791206	2.09e-22	1.49e-21
AR	3.2636	2.35683	-0.906772	6.33e-09	1.11e-08
DAXX	2.77145	3.88432	1.11287	1.47e-24	1.88e-23
FGFR4	3.99028	5.10254	1.11226	3.1e-18	1.17e-17
PRDX2	5.87527	6.4281	0.552833	2.19e-14	5.68e-14
NMB	0.737737	2.09797	1.36024	1.27e-25	2.43e-24
C9	8.50378	4.25194	-4.25184	2.02e-23	1.86e-22
FKBP2	5.40972	5.93969	0.529964	1.67e-09	3.06e-09
CD63	6.55404	7.50646	0.952416	2.82e-19	1.21e-18
NFKBIB	3.29997	3.8473	0.547327	5.24e-12	1.12e-11
SEMA6C	0.805285	1.87766	1.07237	7.08e-21	3.87e-20
PPP1R10	3.55158	4.05314	0.501569	1.04e-10	2.05e-10
MANF	3.88475	5.34187	1.45712	6.18e-23	5e-22
CAMLG	2.8851	3.78552	0.900422	3.21e-25	5.18e-24
